# Supplementary material for: Priming with Japanese encephalitis virus or yellow fever virus vaccination led to the recognition of multiple flaviviruses without boosting antibody responses induced by an inactivated Zika virus vaccine
Source: PubMed Central journal article supplement — eBioMedicine. 2023 Oct 2;97:104815. doi: 10.1016/j.ebiom.2023.104815 (PMC10562857; doi:10.1016/j.ebiom.2023.104815), 2023-10-02
Supplement: mmc1.pdf [file mmc1.pdf]

**Table S1. Antigen panel.** Antigens used for the immunoassay are listed along with the manufacturer and their expression system. Some flavivirus antigens were produced in-house as previously reported (Merbah et al., Journal of Immunological Methods, 2020). The panel included 23 antigens corresponding to Envelope (E) and non-structural 1 (NS1) from different flaviviruses (ZIKV, DENV1-4, YFV, WNV, JEV and TBEV) and to E1 from the alphavirus Chikungunya. Anti-human IgG was used as a control.

| Antigen             | Manufacturer†              | Catalog no.    | Expression system          |
|---------------------|----------------------------|----------------|----------------------------|
| AntiHuman_IgG       | SouthernBiotech            | 9042-01        | Mouse                      |
| ZIKV_PRV.WT_E.dom12 | Produced in-house          | NA             | Drosophila S2-insect cells |
| ZIKV_PRV.WT_E.dom3  | Produced in-house          | NA             | Expi293F-human cells       |
| ZIKV_Sur_NS1        | The Native Antigen Company | ZIKVSU-NS1-100 | HEK293-human cells         |
| ZIKV_FP13_NS1       | R&D Systems                | 9450-ZK-100    | HEK293-human cells         |
| ZIKV_Sur_E          | The Native Antigen Company | ZIKVSU-ENV-100 | HEK293-human cells         |
| ZIKV_PRV.WT_E       | Produced in-house          | NA             | Drosophila S2-insect cells |
| ZIKV_PRV.FL4_E      | Produced in-house          | NA             | Drosophila S2-insect cells |
| ZIKV_ConAf_E        | Produced in-house          | NA             | Drosophila S2-insect cells |
| JEV_SA14_E          | Produced in-house          | NA             | Drosophila S2-insect cells |
| JEV_SA14_NS1        | The Native Antigen Company | JEV-NS1-100    | HEK293-human cells         |
| YFV_17D_E           | Produced in-house          | NA             | Drosophila S2-insect cells |
| YFV_17D_NS1         | The Native Antigen Company | YFV-NS1-100    | HEK293-human cells         |
| DENV.4_Dom81_NS1    | The Native Antigen Company | DENV4-NS1-100  | HEK293-human cells         |
| DENV.4_Dom81_E      | The Native Antigen Company | DENV4-ENV-100  | HEK293-human cells         |
| DENV.3_PR98_NS1     | Cal Bioreagents            | A256           | Baculovirus-insect cells   |
| DENV.3_PR98_E       | Cal Bioreagents            | A252           | Baculovirus-insect cells   |
| DENV.2_Ind01_NS1    | Cal Bioreagents            | A255           | Baculovirus-insect cells   |
| DENV.2_Ind01_E      | Cal Bioreagents            | A251           | Baculovirus-insect cells   |
| DENV.1_VN07_NS1     | Cal Bioreagents            | A254           | Baculovirus-insect cells   |
| DENV.1_VN07_E       | Cal Bioreagents            | A250           | Baculovirus-insect cells   |
| WNV_NY99_E          | The Native Antigen Company | REC31614-100   | HEK293-human cells         |
| WNV_NY99_NS1        | The Native Antigen Company | WNV-NS1-100    | HEK293-human cells         |
| TBEV_Neu_NS1        | The Native Antigen Company | TBEV-NS1-100   | HEK293-human cells         |
| CHIKV_NA_E1         | The Native Antigen Company | CHIKV-E1-100   | HEK293-human cells         |

\*CHIKV, chikungunya virus; DENV, dengue virus; JEV, Japanese encephalitis virus; TBEV, tickborne encephalitis virus; YFV, yellow fever virus; WNV, West Nile virus; ZIKV, Zika virus.

**Table S2. Demographic information of the study participants**

| Priming Vaccine         |                                  | Naïve (n = 25) |            | JEV (n = 24) |            | YFV (n = 24) |            |
|-------------------------|----------------------------------|----------------|------------|--------------|------------|--------------|------------|
| Investigational Vaccine |                                  | Placebo        | ZPIV       | Placebo      | ZPIV       | Placebo      | ZPIV       |
| Age at Enrollment       | Mean (SD)                        | 33.4 (11.1)    | 30.3 (8.4) | 31.4 (10.2)  | 30.9 (6.9) | 32.5 (4.4)   | 28.9 (5.9) |
| Sex                     | Female                           | 1              | 10         | 3            | 10         | 2            | 14         |
|                         | Male                             | 4              | 10         | 2            | 9          | 2            | 6          |
| BMI                     | Mean (SD)                        | 26.5 (5.0)     | 26.3 (3.6) | 25.8 (4.1)   | 25.5 (4.0) | 25.4 (2.3)   | 24.8 (2.4) |
| Ethnicity               | Hispanic or Latino               | 0              | 3          | 0            | 2          | 0            | 2          |
|                         | Not Hispanic or Latino           | 5              | 17         | 5            | 17         | 4            | 18         |
| Race                    | American Indian or Alaska Native | 0              | 2          | 0            | 0          | 0            | 0          |
|                         | Asian                            | 1              | 0          | 1            | 0          | 0            | 1          |
|                         | Black or African American        | 3              | 7          | 1            | 6          | 1            | 5          |
|                         | Multiple                         | 0              | 1          | 0            | 0          | 0            | 2          |
|                         | White                            | 1              | 10         | 3            | 13         | 3            | 12         |

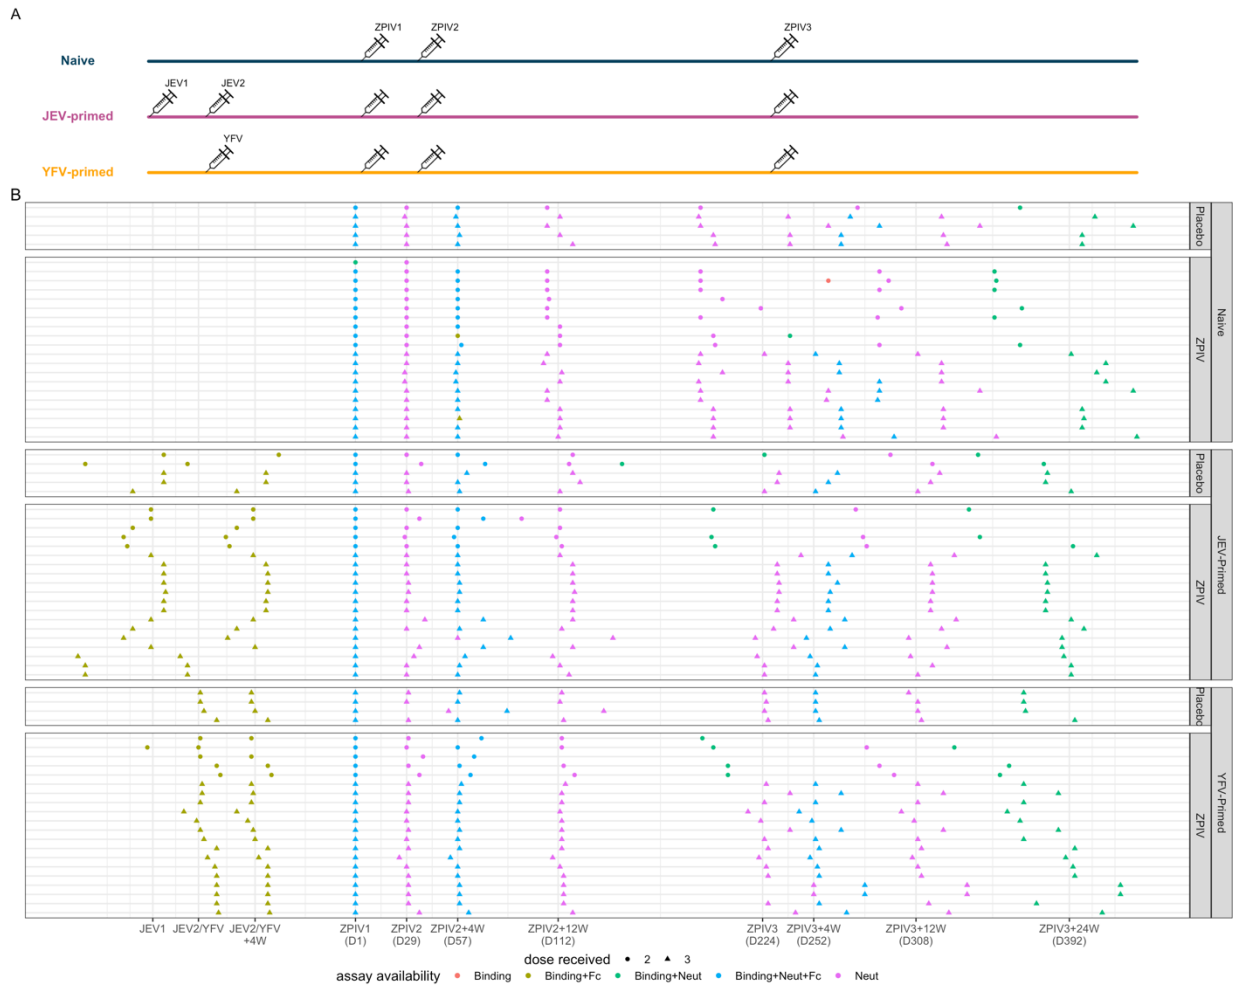

**Fig. S1. Timeline of immunizations and sample collection for experimental assays.** (A) Immunization schedule for the three groups labeled based on their vaccination status prior to ZPIV vaccination: Naïve, JEV-primed, YFV-primed (B) Description of the experimental data generated at each time point: antibody binding (Binding), Fc effector function (Fc) and neutralization (Neut) assays. JEV1: first dose of JEV vaccination (at enrollment); JEV2: second dose of JEV vaccination; YFV: YFV vaccination (at enrollment); ZPIV1: first dose of ZPIV vaccination (at ZPIV baseline); ZPIV2 and ZPIV3: second and third dose of ZPIV.

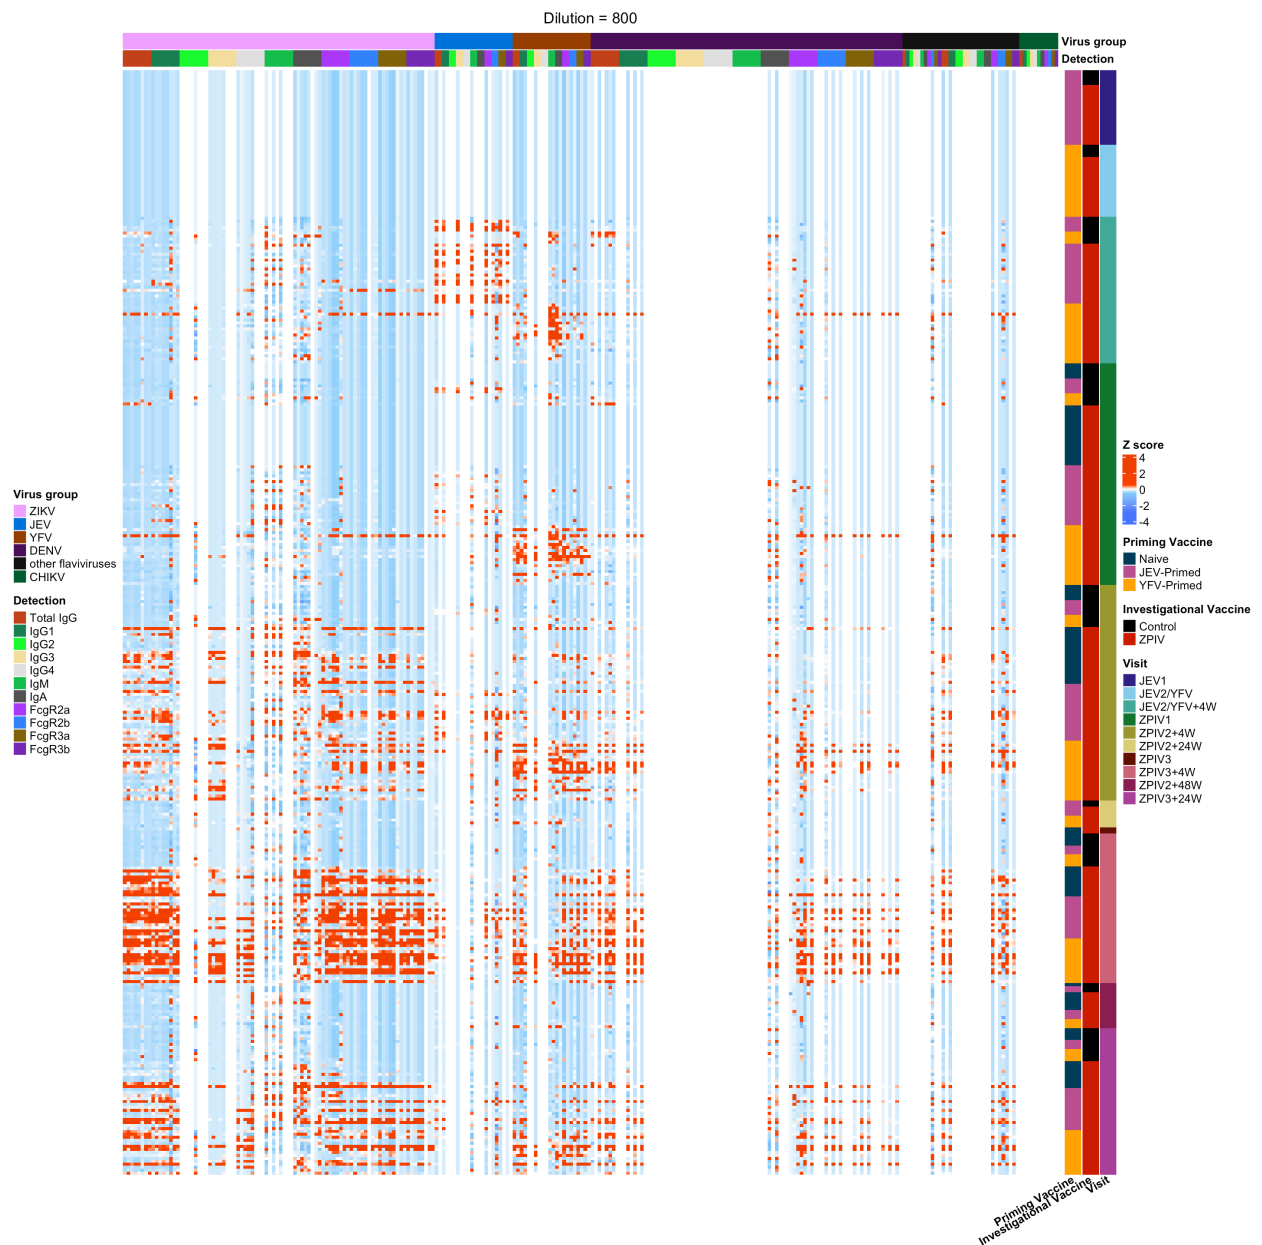

**Fig. S2. Binding antibody responses to 23 E and NS1 flavivirus antigens and one alphavirus E antigen.** The heatmap shows antibody binding responses presented as z-scores for 371 samples collected longitudinally. Each row represents a sample. Each column corresponds to a specific antigen and detection combination (feature). Features with near zero variance (fewer than three samples with a fold over baseline > 3) were shown as blank columns.

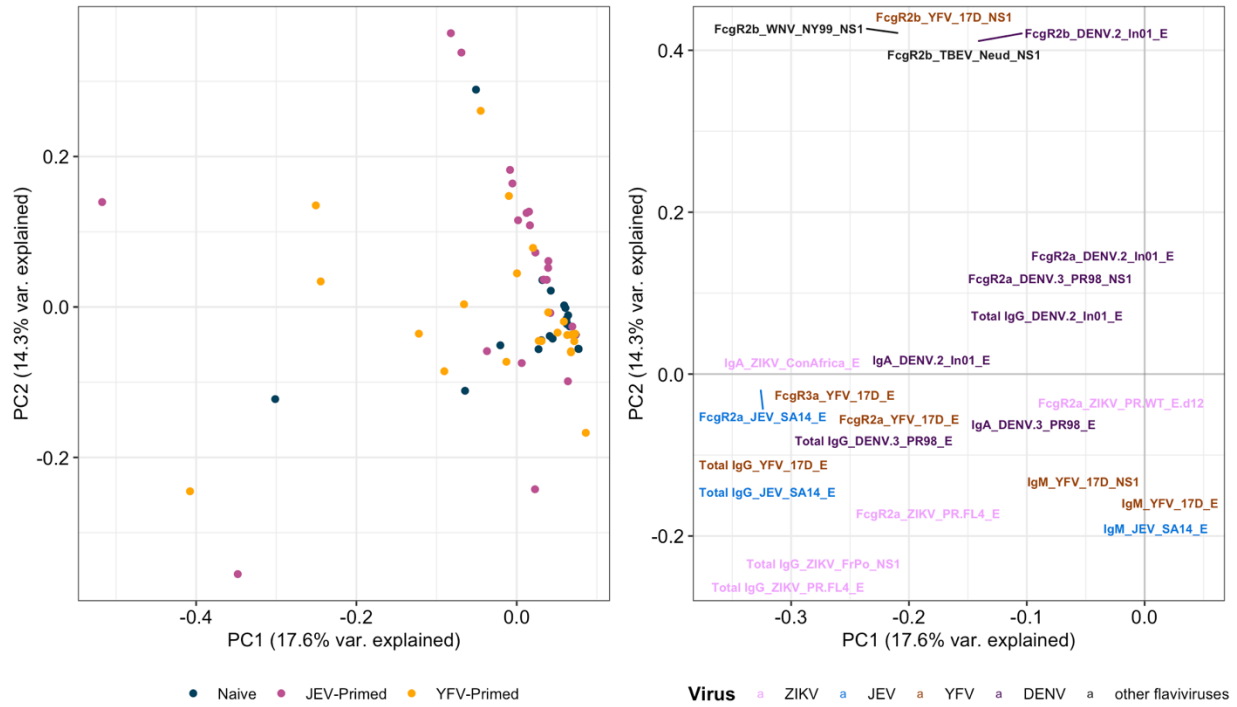

**Fig. S3. Flavivirus-specific binding antibody profile at study enrollment.** Principal component analysis based on antibody binding responses measured to 23 E and NS1 flavivirus antigens and one alphavirus E antigen. Score (left panel) and loading (right panel) plots of the first two PCs show limited variation of binding features principally driven by a few individuals with no evidence of clustering based on study groups.

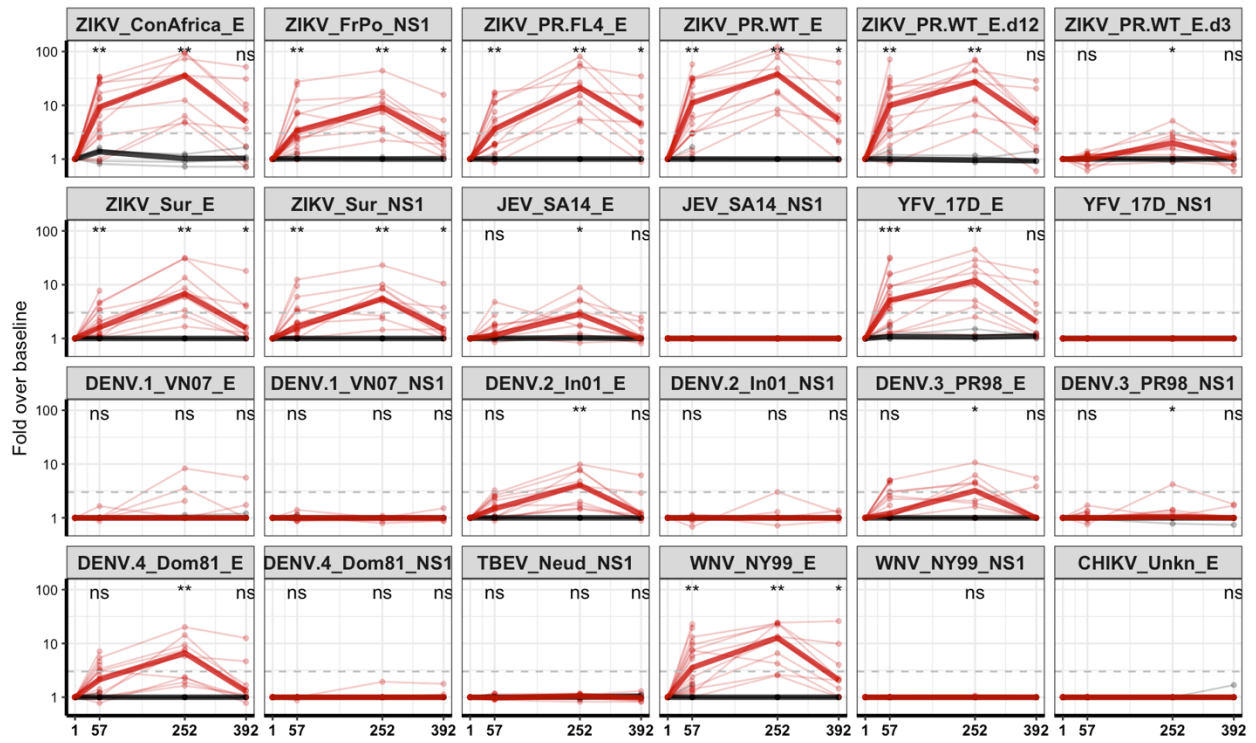

**Fig. S4. IgG responses following ZPIV vaccination in the naïve group.** Binding antibody responses are shown as fold over baseline at baseline (day 1, first vaccination), four weeks after the second dose (day 57), four weeks after the third dose (day 252) and five months later (day 392). Samples from vaccine and placebo recipients in red and black, respectively. The significance of Wilcoxon rank sum test is shown in each panel. ns:  $p > 0.05$ ; \*:  $p \leq 0.05$ ; \*\*:  $p \leq 0.01$ ; \*\*\*:  $p \leq 0.001$ ; \*\*\*\*:  $p \leq 0.0001$ .

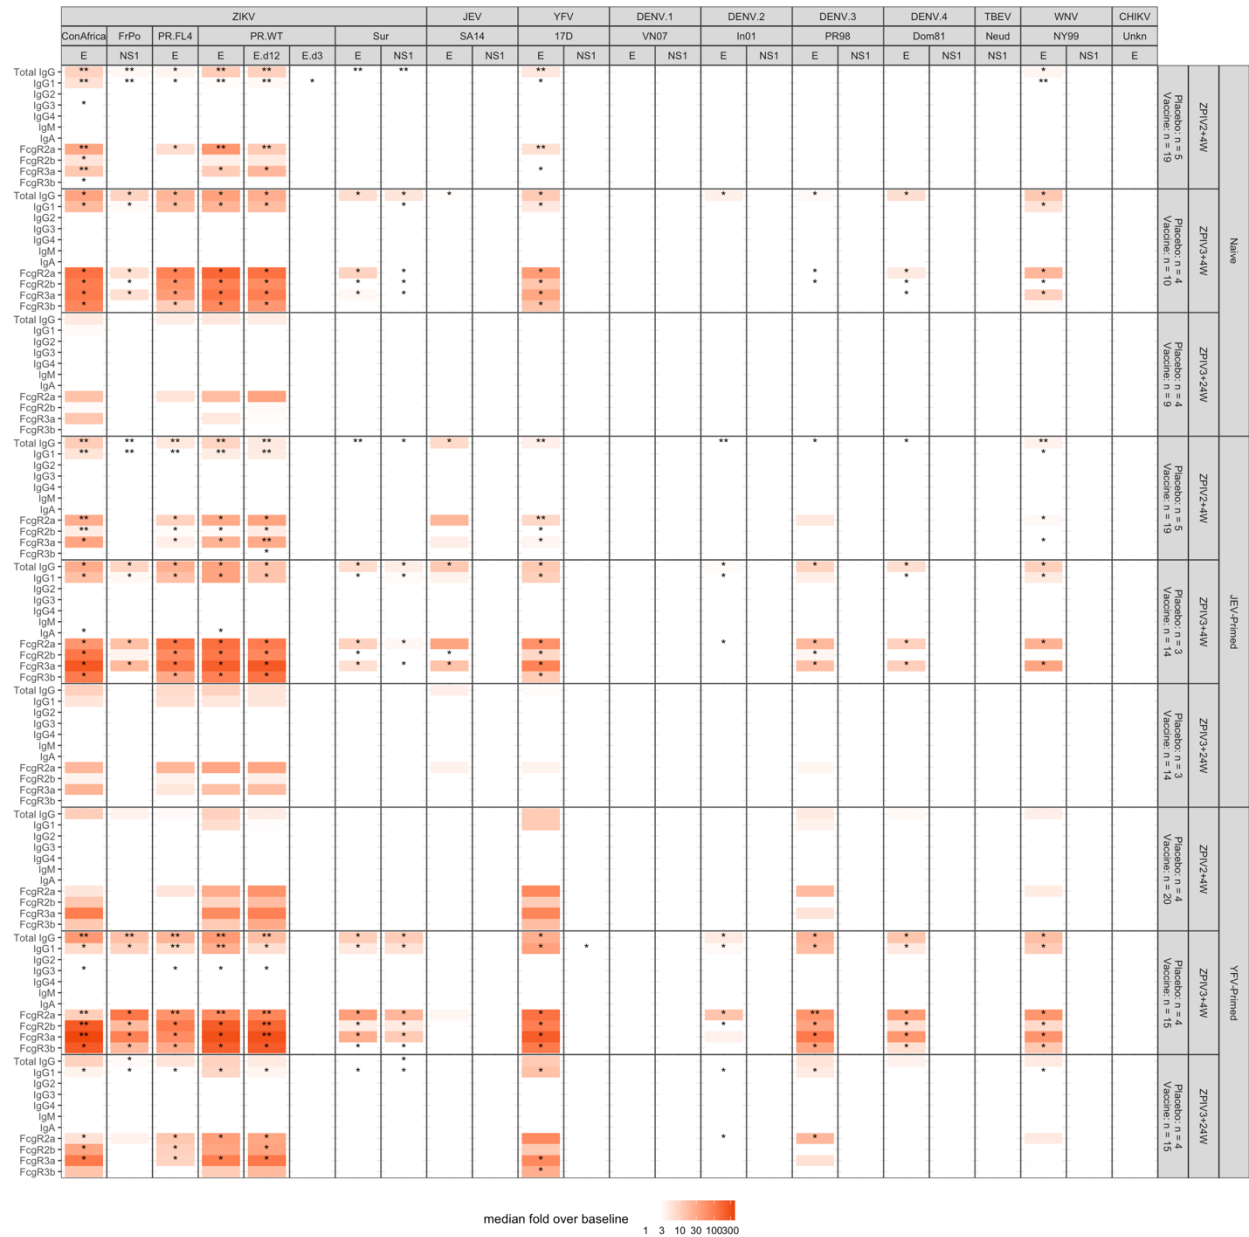

**Fig. S5. Median fold over baseline for antibody binding responses in vaccine recipients.** Antibody binding responses against 24 antigens and 11 detections are represented for each vaccine group and at each time point. Significant differences of responses between vaccine and placebo recipients using Wilcoxon rank sum test adjusted using the Benjamini-Hochberg procedure are reported with asterisks: \*:  $p \leq 0.05$ ; \*\*:  $p \leq 0.01$ ; \*\*\*:  $p \leq 0.001$ ; \*\*\*\*:  $p \leq 0.0001$ .

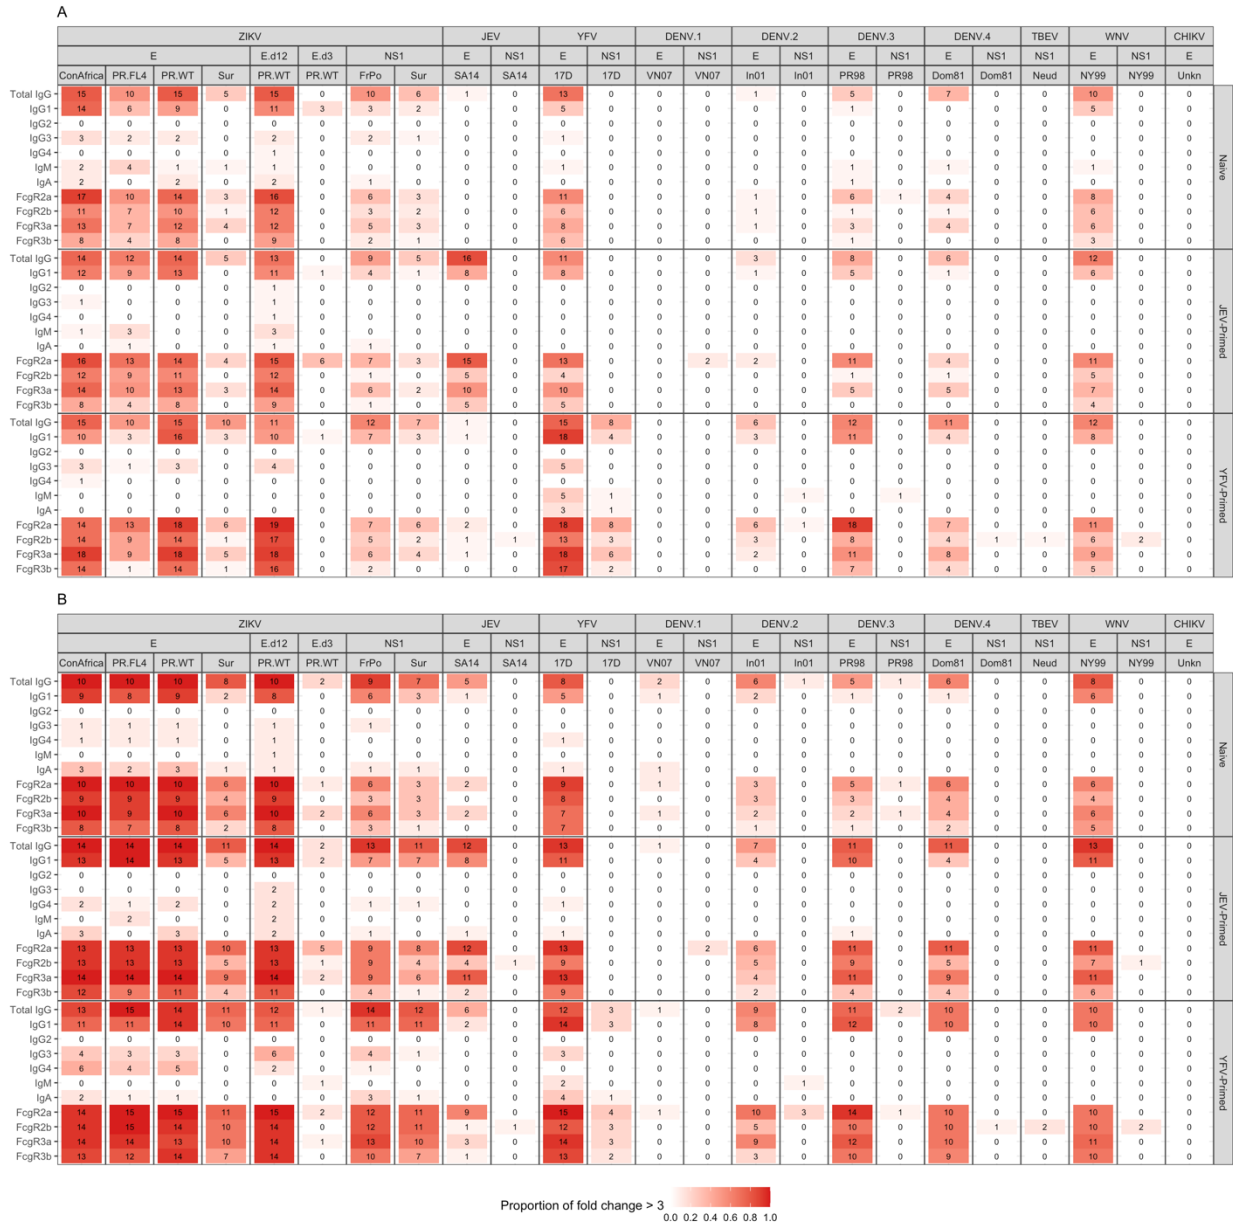

**Fig. S6. Proportion of positive samples four weeks after the second (A) and third (B) ZPIV vaccinations.** Number of positive samples using a fold over baseline >3 across the 24 antigens and 11 detection reagents tested.



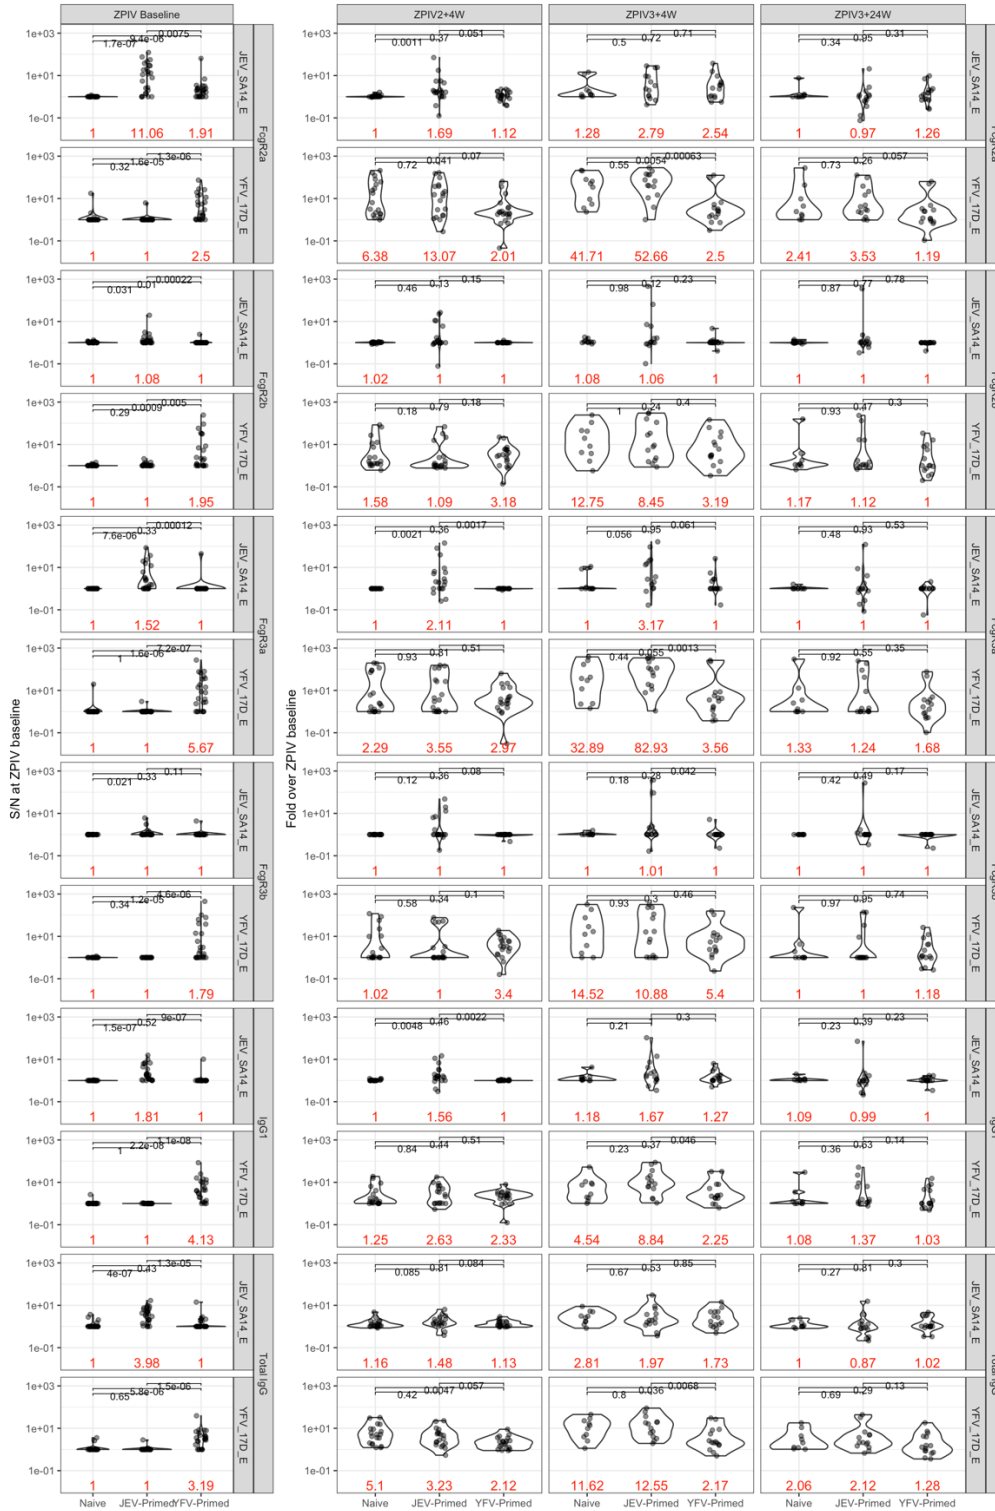

**Fig. S7. Antibody responses against JEV and YFV across time points.** The left panel shows the signal to noise ratio following the priming vaccination(s), at the time of the first ZPIV dose (ZPIV baseline). The right panel shows the fold increase calculated from the ZPIV baseline at 4 weeks after the second (Day 57) and third (Day 252) doses and at the last visit (ZPIV3+24W, Day 392). Median values of each group were shown in red at the bottom.

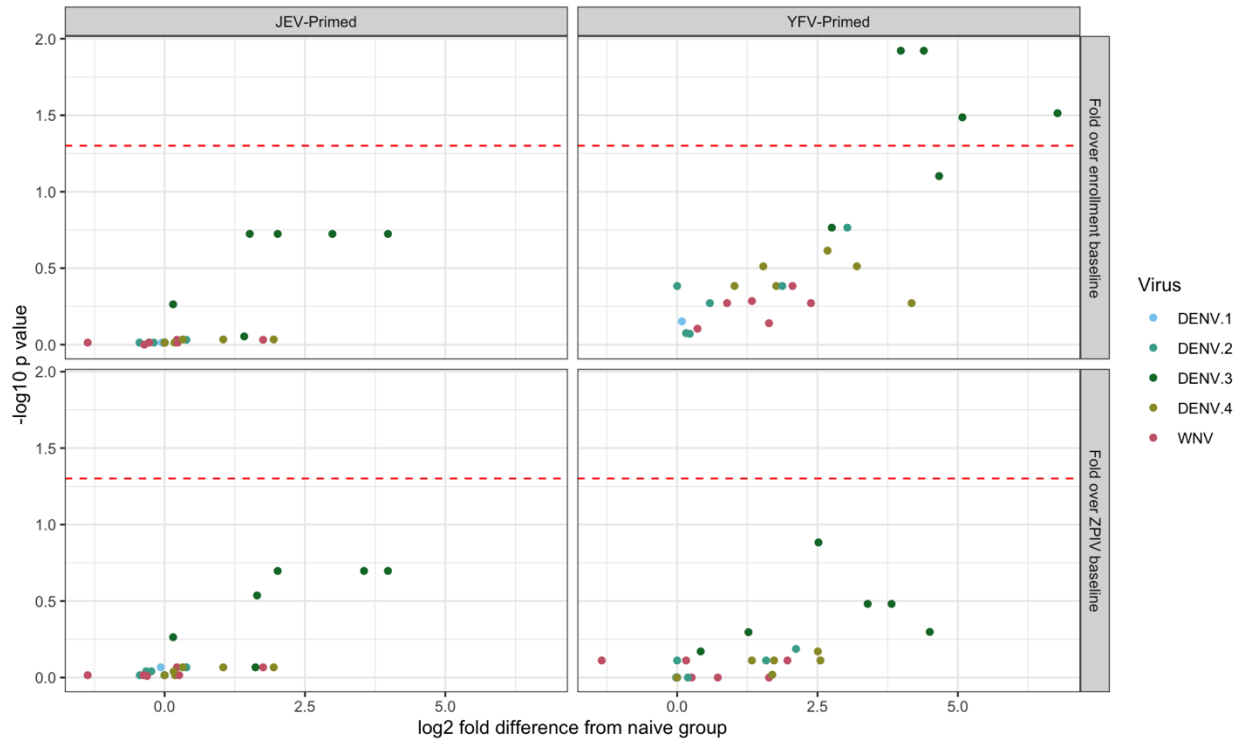

**Fig. S8. Higher antibody binding responses against flaviviruses not included in the vaccines in the two primed groups.** The fold difference in antibody responses is calculated between each primed groups and the naïve group using median fold over levels at enrollment visit (top) and at ZPIV baseline (bottom). Antibody responses correspond to total IgG, IgG1 and four Fc gamma receptors four weeks after the third ZPIV vaccination against the flaviviruses not part of the vaccines: DENV1-4 and WNV. P values of Wilcoxon rank sum tests are adjusted using the Benjamini–Hochberg procedure and a p value of 0.05 is shown with a red dashed line.

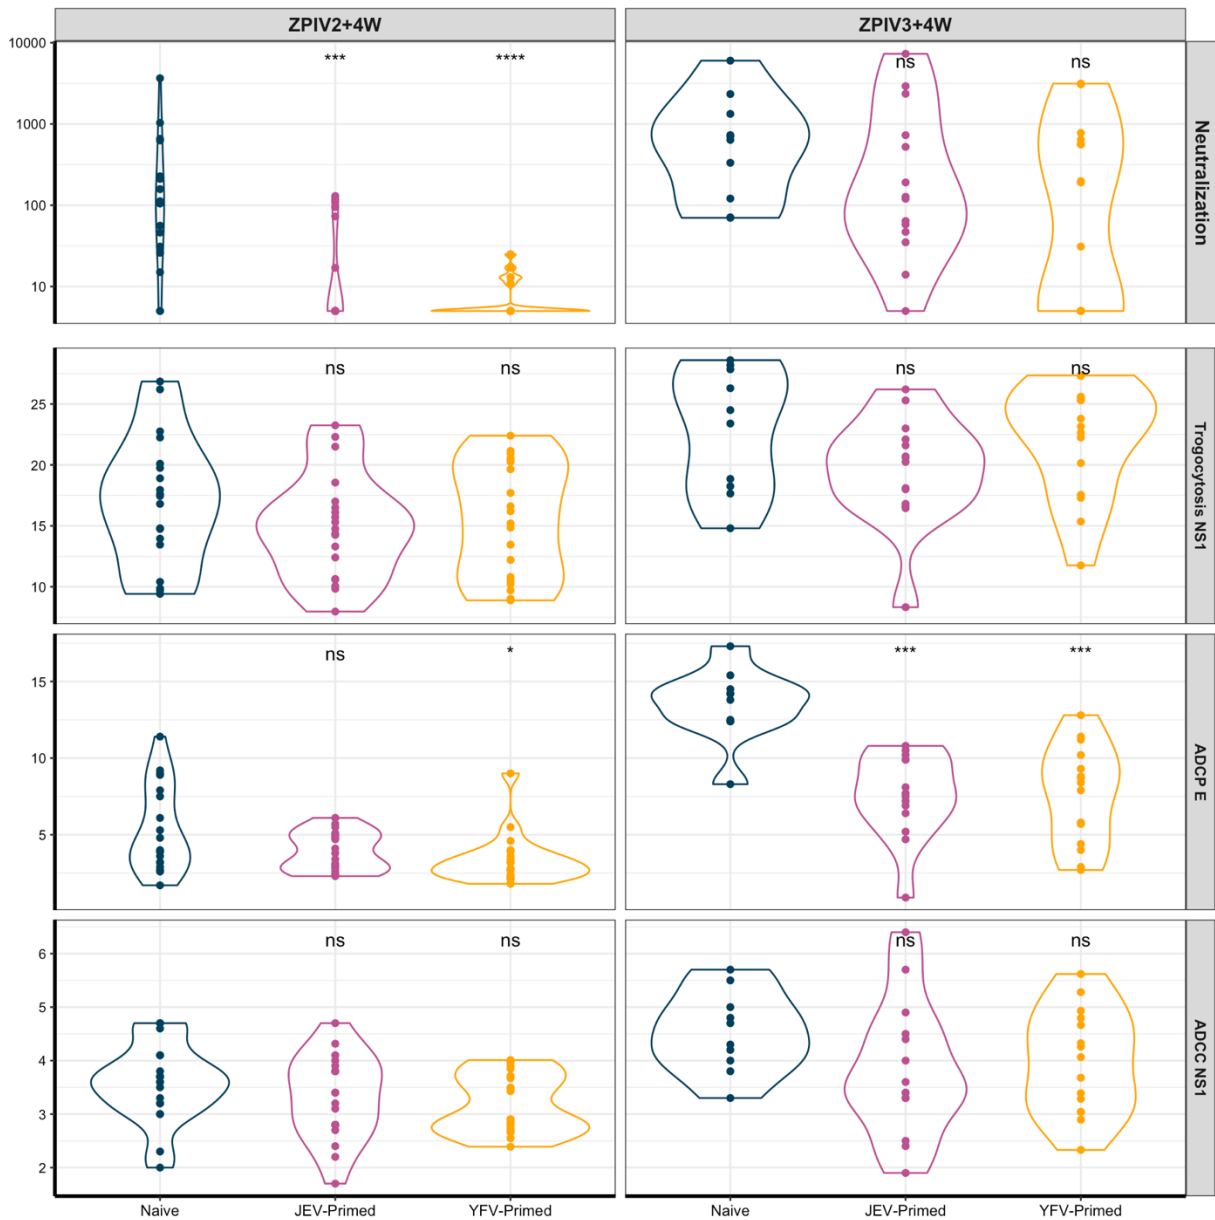

**Fig. S9. Neutralizing antibody responses and Fc effector function responses against ZIKV in vaccine recipients four weeks after the second and third ZPIV vaccination.** Functional responses are compared between the naïve group and the two primed groups. The significance of Wilcoxon rank sum test is shown in each panel. ns:  $p > 0.05$ ; \*:  $p \leq 0.05$ ; \*\*:  $p \leq 0.01$ ; \*\*\*:  $p \leq 0.001$ ; \*\*\*\*:  $p \leq 0.0001$ .

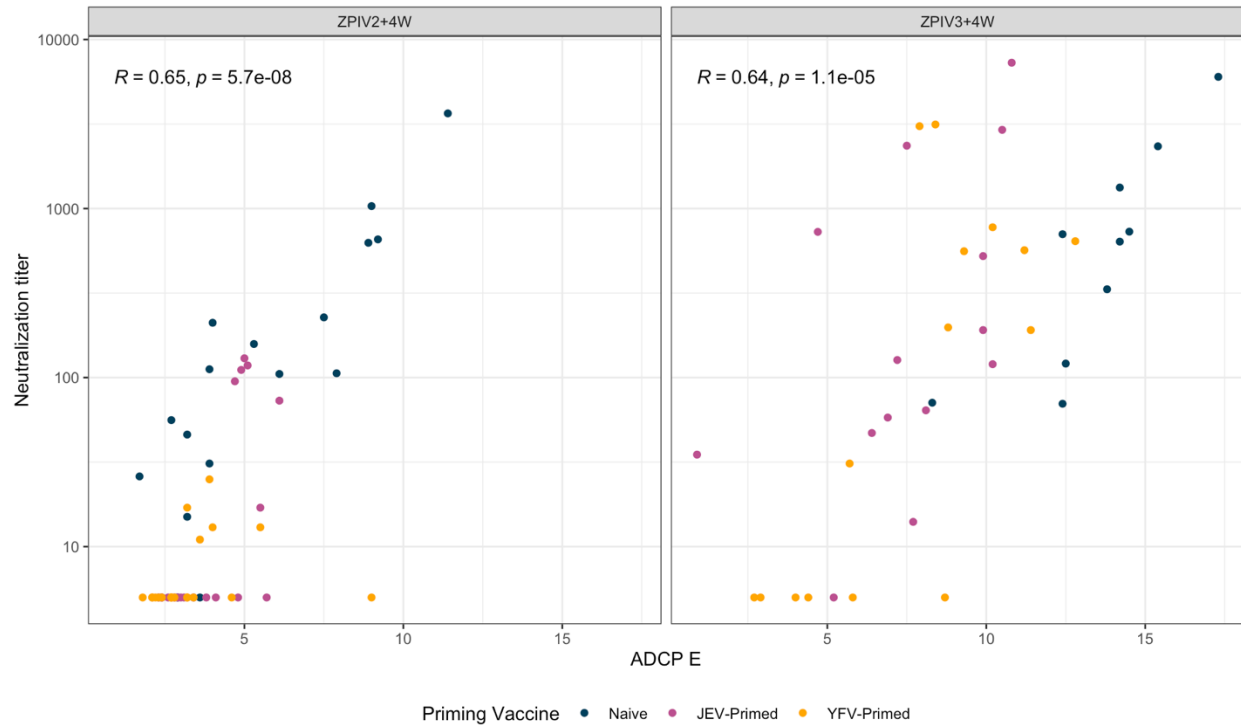

**Fig. S10. Relationship between neutralization titer and ADCP against ZIKV four weeks after the second and third dose of ZPIV vaccination.** Spearman's correlations were calculated with Rho and p values shown in each panel.

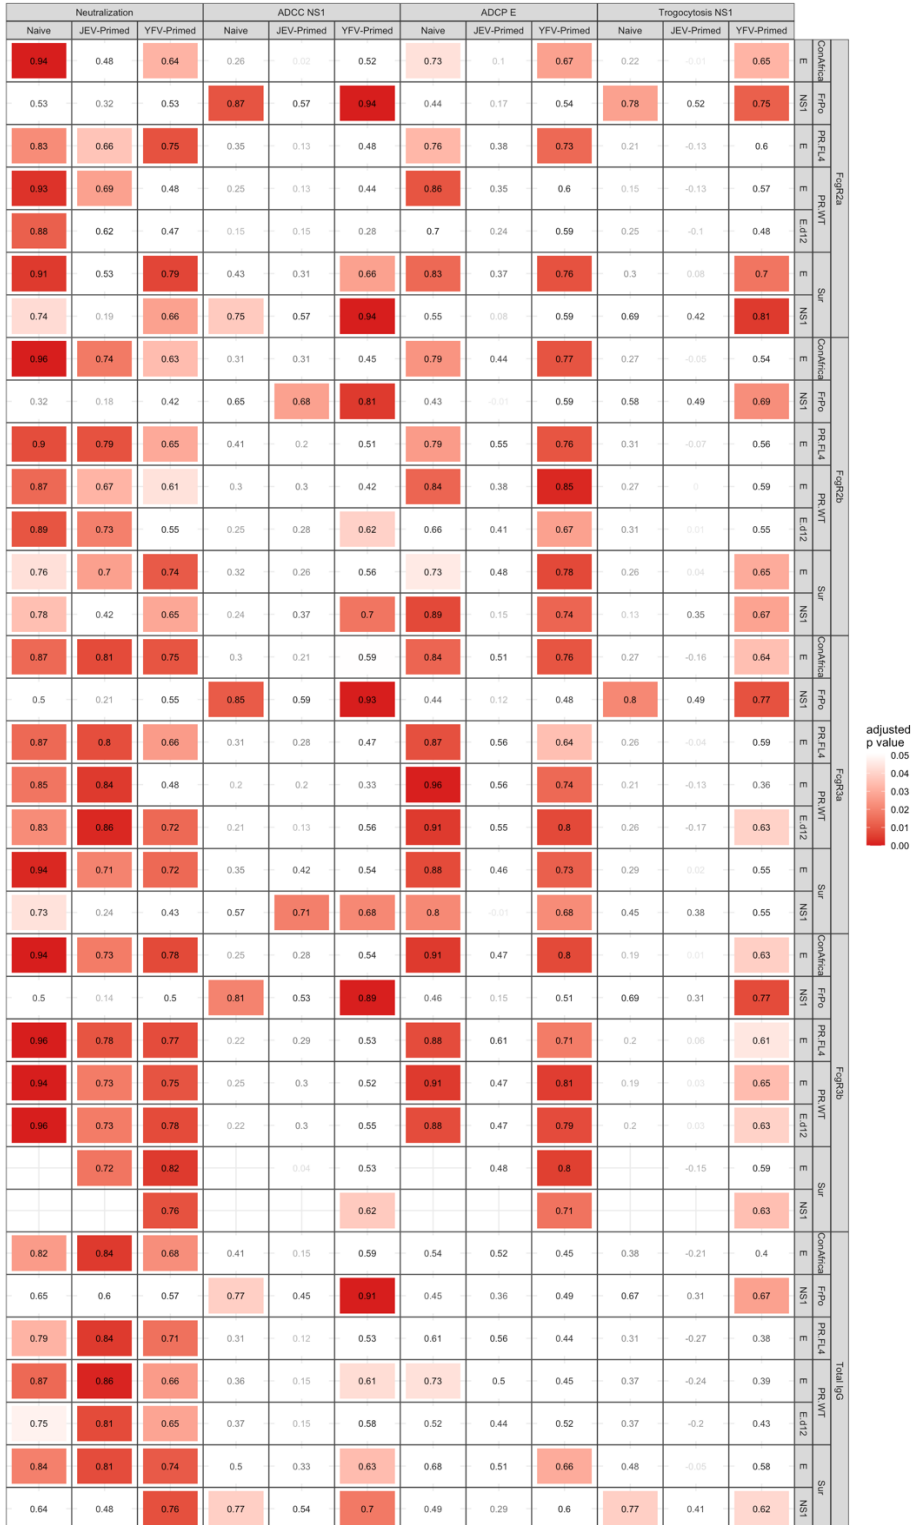

**Fig. S11. Relationship between functional and binding antibody responses against ZIKV four weeks after the third ZPIV vaccination.** Spearman correlations between four functional responses (neutralization, ADCC, ADCP, trogocytosis) and IgG response and antibody binding to four Fcγ receptors are reported with Rho values and significant relationships shown in red (p values < 0.05 adjusted using the Benjamini–Hochberg procedure).

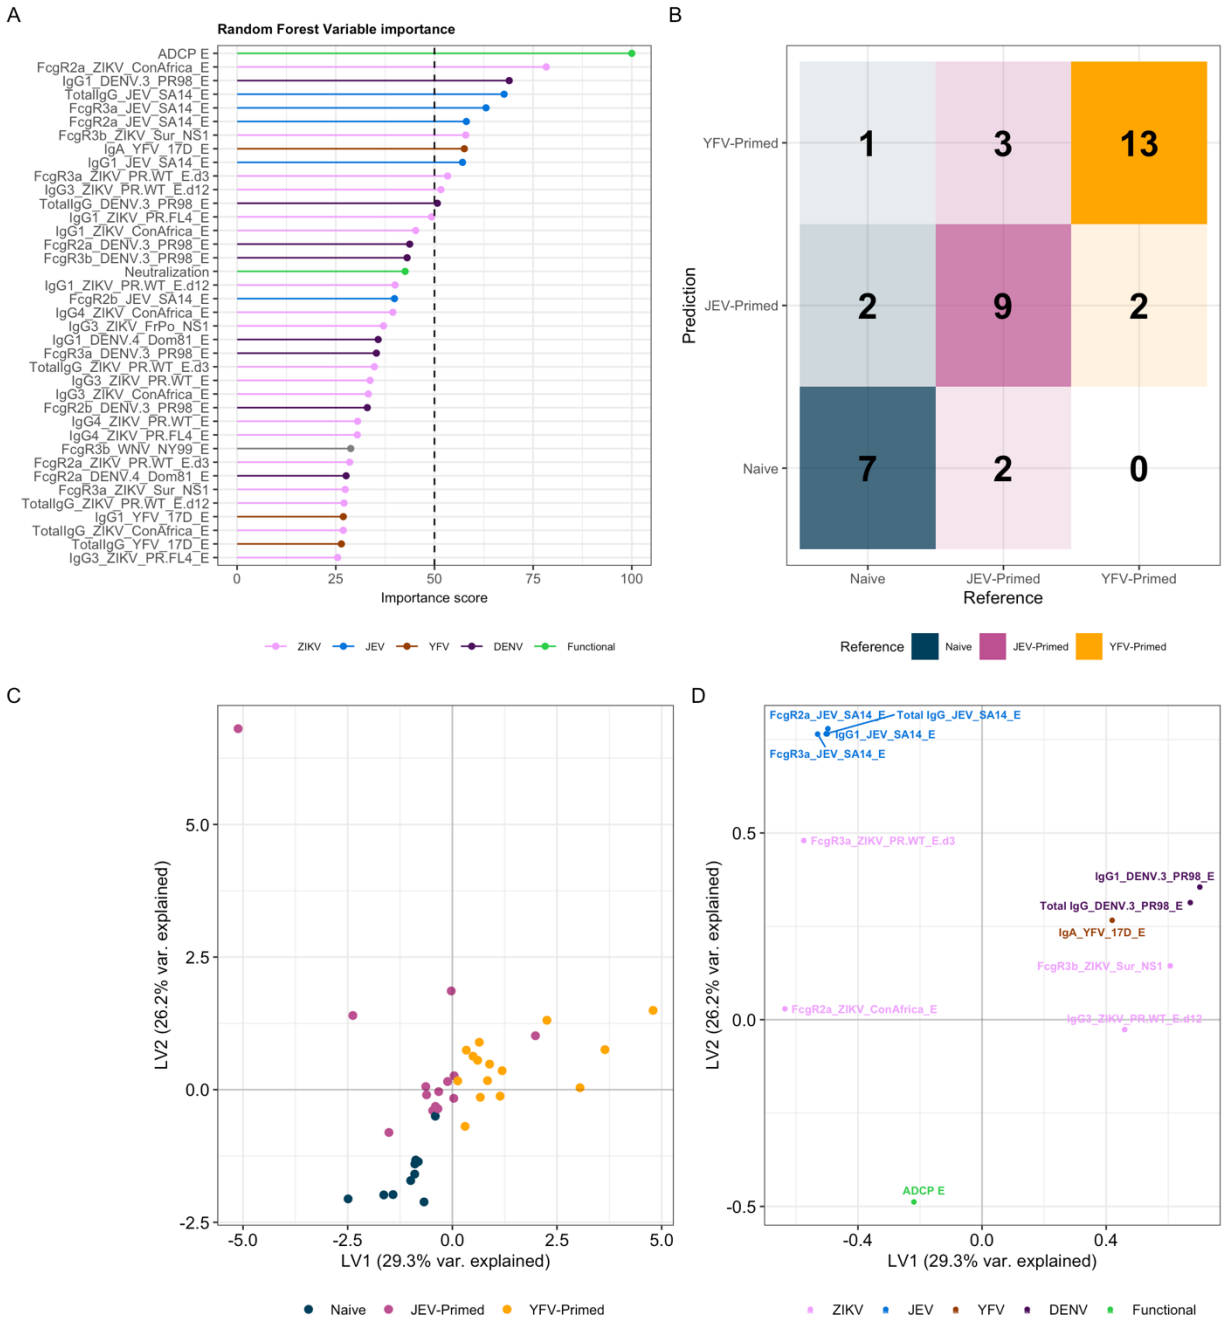

**Fig. S12. Immune profiles four weeks after the third ZPIV vaccination (day 252).** Random Forest models selected features that are reported with their importance score (A) and used to classify participants in each vaccine group (B). PLSDA models are shown with PLSDA scores (C) and loadings (D).

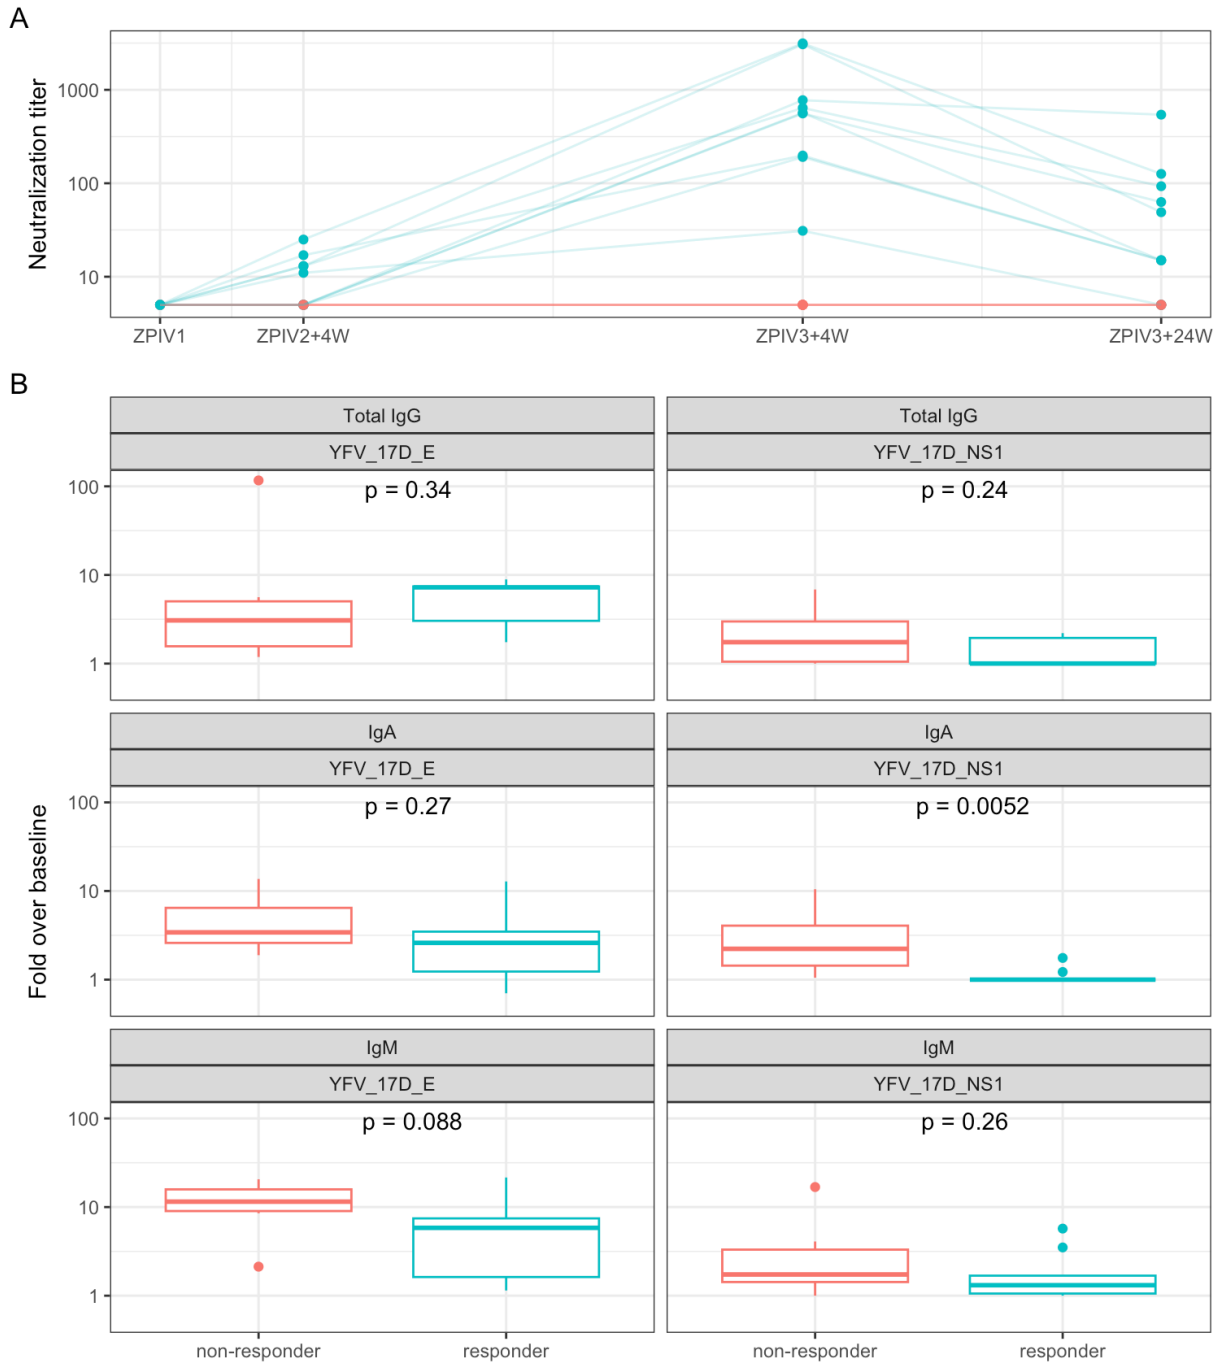

**Fig. S13. Higher YFV antibody binding responses after the YFV vaccination in participants who did not mount ZPIV neutralization responses following ZPIV vaccination.** (A) Participants who received a priming YFV vaccination were classified as responders (N=9) and non-responders (N=6) based on the ZPIV neutralization titers measured following ZPIV vaccination. (B) IgG, IgA and IgM responses to YFV E and NS1 antigens in responders and non-responders four weeks after the priming YFV vaccination. Neutralization responders and non-responders were compared using Wilcoxon rank sum test and the p value is reported in each panel.

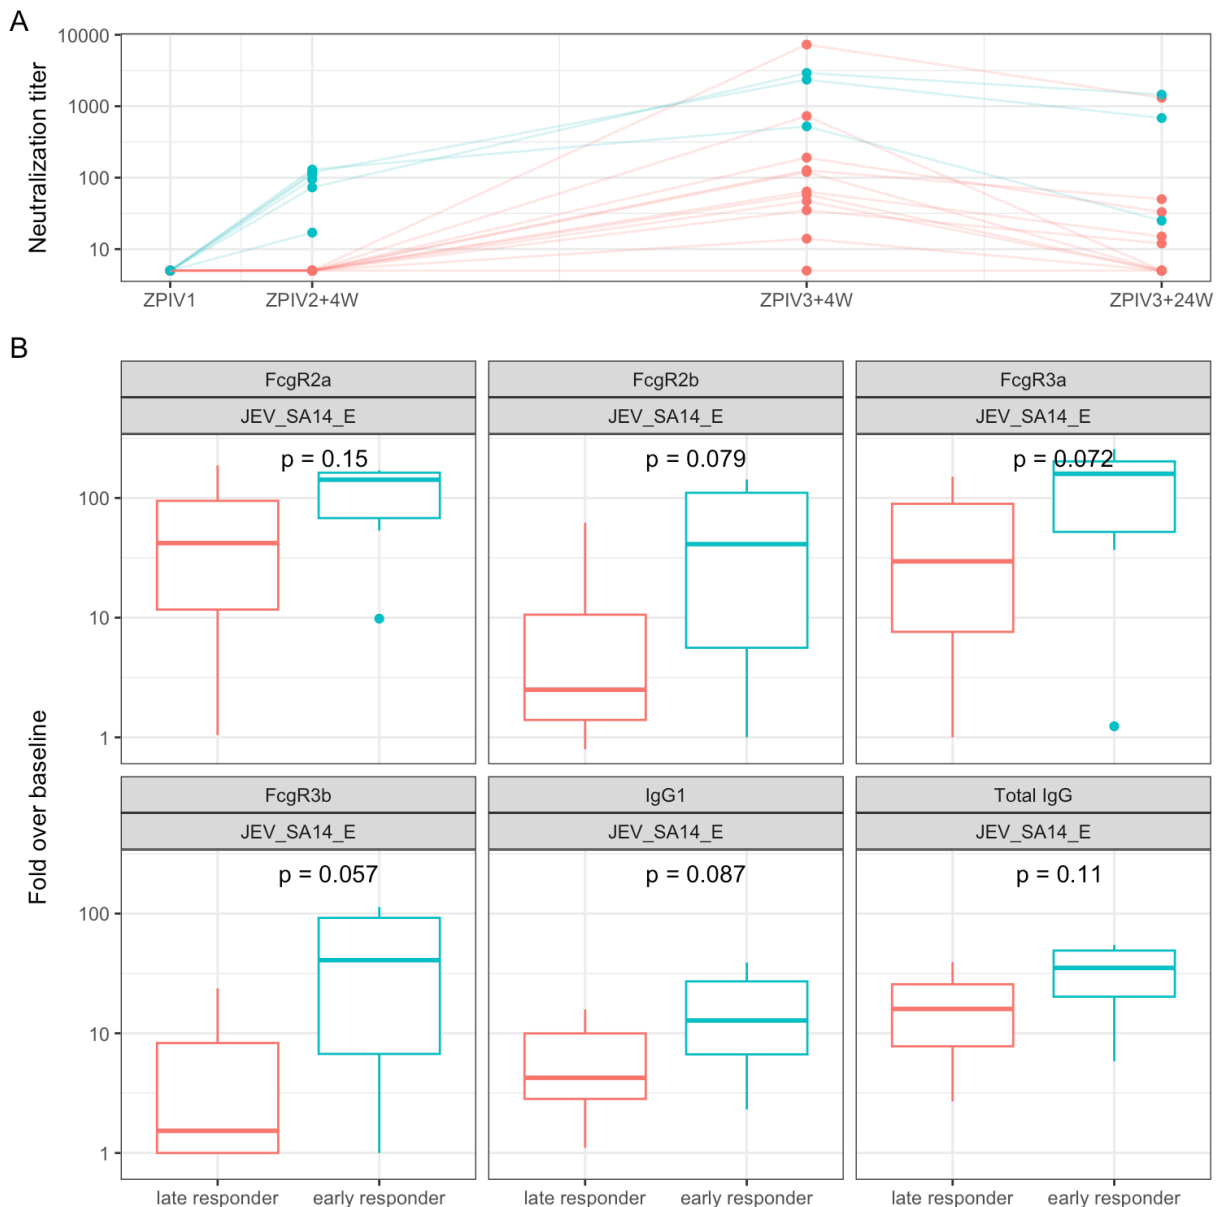

**Fig. S14. Higher JEV antibody binding responses after the JEV vaccination in participants with early ZPIV neutralization responses following ZPIV vaccination.** (A) Participants who received a priming JEV vaccination were classified as early responders (N=6) and late responders (N=13) based on the ZPIV neutralization titers measured following ZPIV vaccination. (B) IgG and Fcγ receptors responses to JEV E antigens in early and late responders four weeks after the priming JEV vaccination. Early and late responders to ZPIV neutralization were compared using Wilcoxon rank sum test and the p value is reported in each panel.
